# Supplementary material for: Synthesis of Pd nanonetworks with abundant defects for oxygen reduction electrocatalysis
Source: Royal Society of Chemistry journal article supplement (doi:10.1039/d0nj05881e), 2021-01-01
Supplement: d0nj05881e1.pdf [file d0nj05881e1.pdf]

Electronic Supplementary Information for

## **Synthesis of Pd Nanonetworks with Abundant Defects for Oxygen Reduction Electrocatalysis**

Xiang Li,<sup>a\*</sup> Xinyuan Peng,<sup>a</sup> Yixuan Wang,<sup>a</sup> and Bo Yan<sup>b</sup>

a. School of Materials and Chemical Engineering, Xi'an Technological University, Xi'an, Shaanxi 710021, China.

b. College of Materials and Chemical Engineering, Key Laboratory of Inorganic Nonmetallic Crystalline and Energy Conversion Materials, China Three Gorges University, Yichang 443002, China.

\*To whom correspondence should be addressed. E-mail: [lixiang@xatu.edu.cn](mailto:lixiang@xatu.edu.cn).

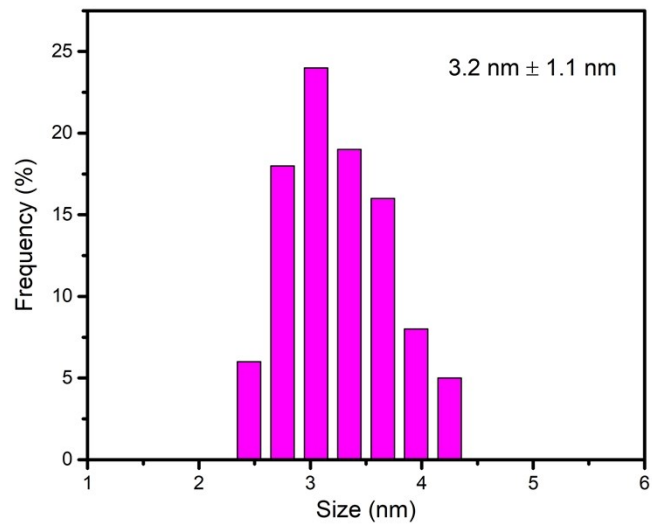

**Fig. S1.** Size distribution of Pd nanonetworks prepared through standard procedure.

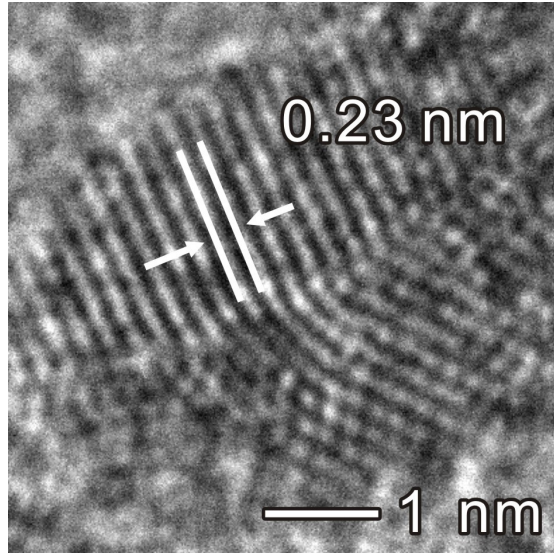

**Fig. S2.** The magnified HRTEM image taken from the Fig. 1c marked by corresponding blue box.

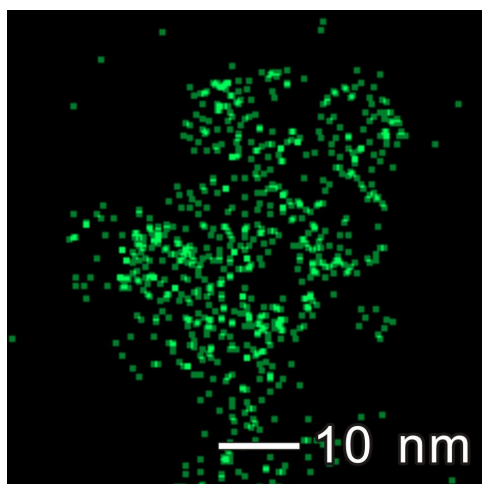

**Fig. S3.** The the corresponding energy-dispersive X-ray spectroscopy mapping of Pd atoms for Fig. 1b.

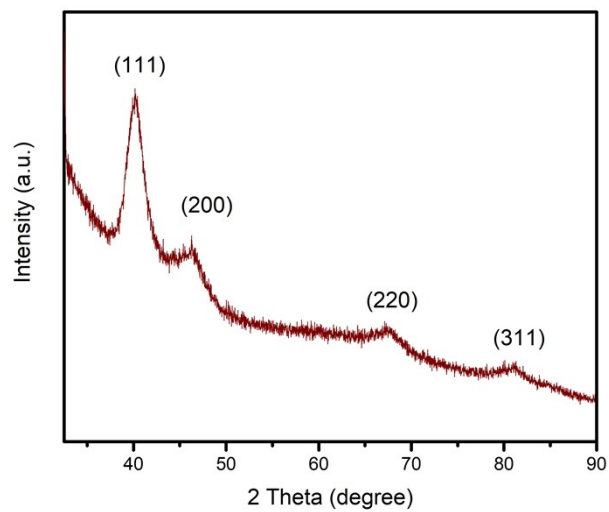

**Fig. S4.** The XRD pattern of Pd nanonetworks prepared through standard procedure.

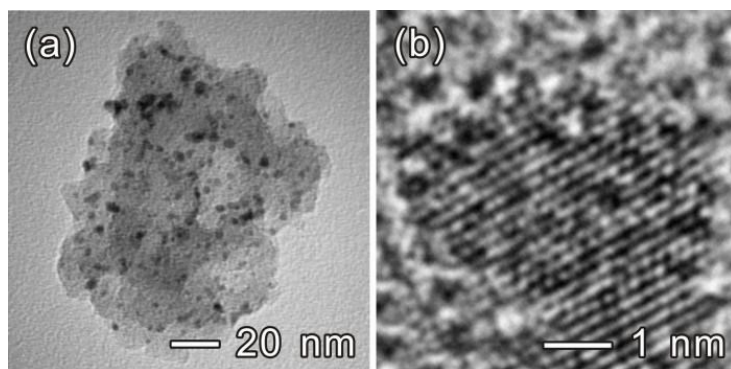

**Fig. S5.** The TEM image (a) and HRTEM image (b) of the commercial Pd/C nanocatalysts.

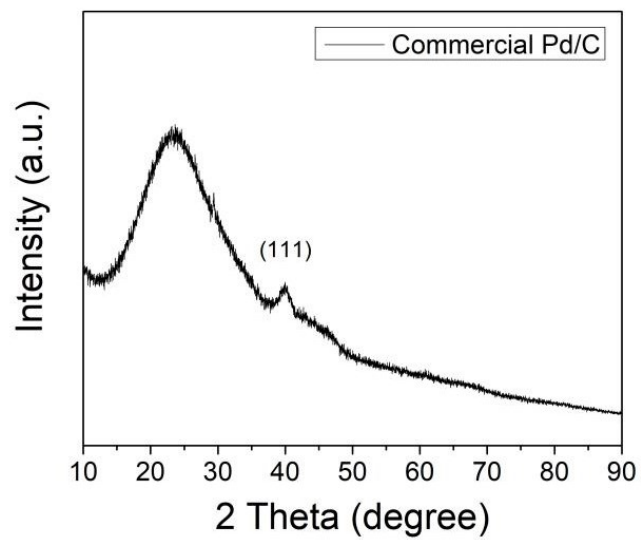

**Fig. S6.** The XRD pattern of the commercial Pd/C nanocatalysts.

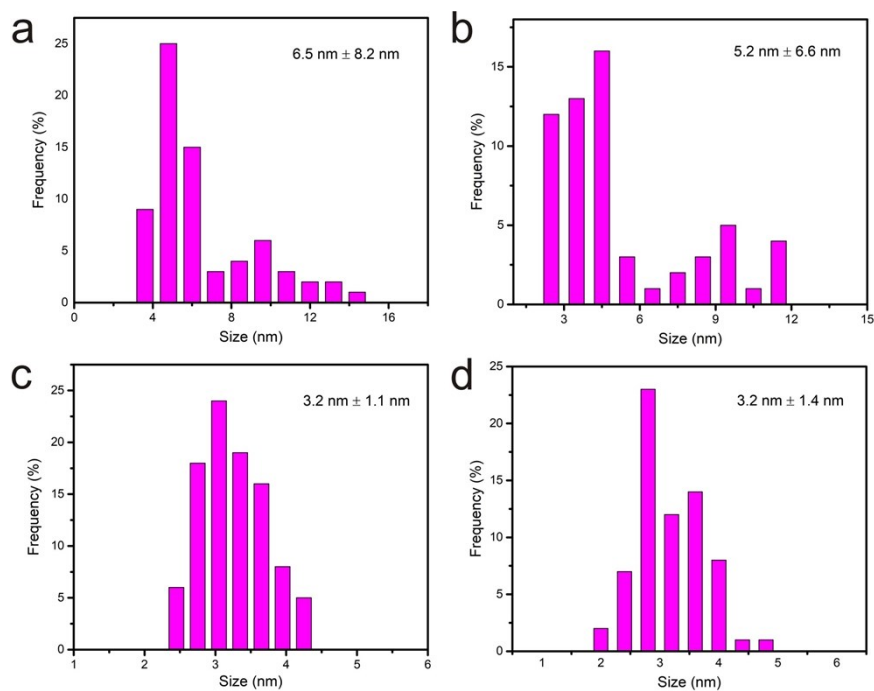

**Fig. S7.** Size distribution of Pd nanonetworks prepared through standard procedure except for the different reactant concentrations, (a) 0.5 mg/mL, (b) 1 mg/mL, (c) 2 mg/mL, and (d) 5 mg/mL.



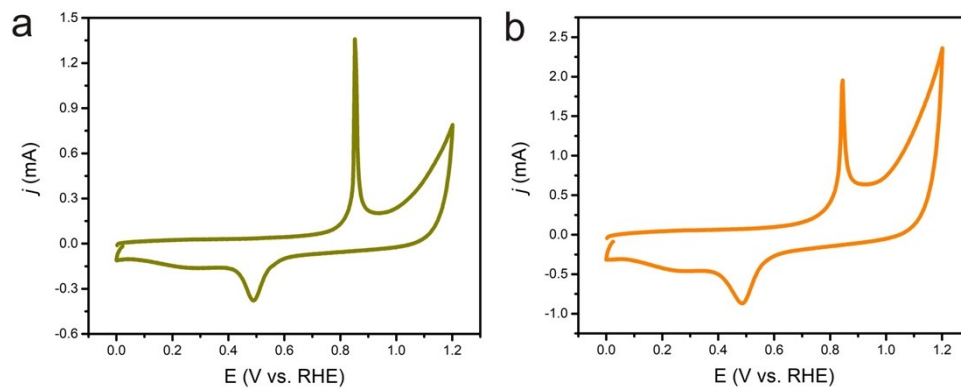

**Fig. S8.** CO-stripping curves of the commercial Pd/C and Pd nanonetworks.

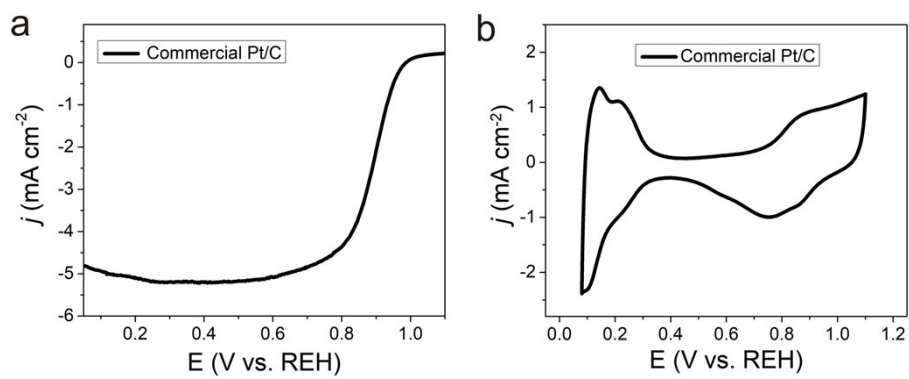

**Fig. S9.** The ORR properties of the commercial Pt/C nanocatalysts. (a) ORR polarization curve for the catalyst at room temperature in O<sub>2</sub>-saturated 0.1 M aqueous HClO<sub>4</sub> solution at a sweep rate of 10 mV s<sup>-1</sup> and rotation speed of 1600 rpm. (b) Cyclic voltammetry curve of the catalyst recorded at room temperature in N<sub>2</sub>-purged 0.1 M aqueous HClO<sub>4</sub> solution with a sweeping rate of 50 mV s<sup>-1</sup>.

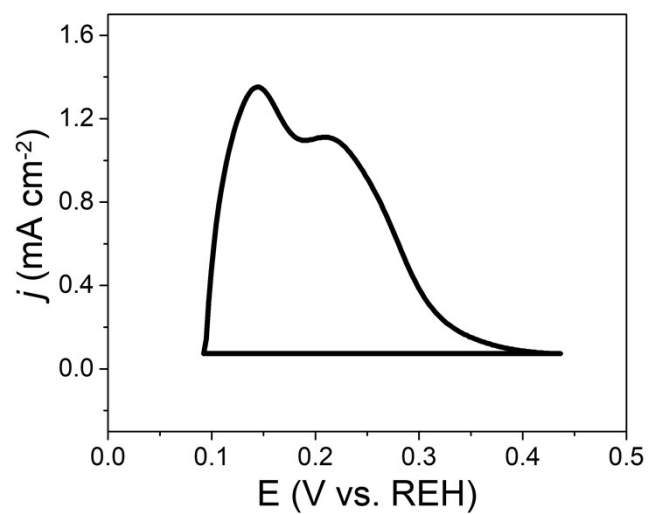

**Fig. S10.** Blow-ups of the  $H_{\text{upd}}$  desorption peak in the potential region from 0.08 to 0.44 V. The specific electrochemical active surface area (ECSA) of commercial Pt/C nanocatalyst is derived from the charges responsible for the  $H_{\text{upd}}$  desorption between 0.04 and 0.44 V.

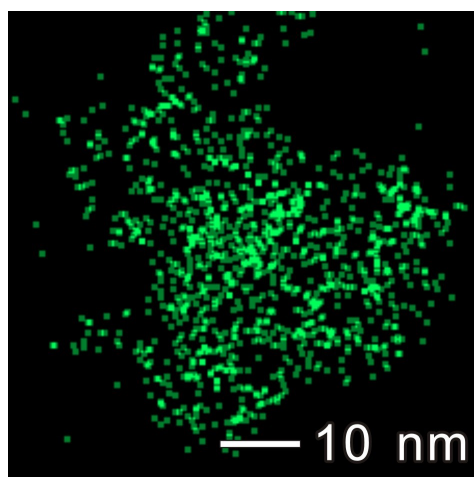

**Fig. S11.** The corresponding energy-dispersive X-ray spectroscopy mapping of Pd atoms for Fig. 3b.

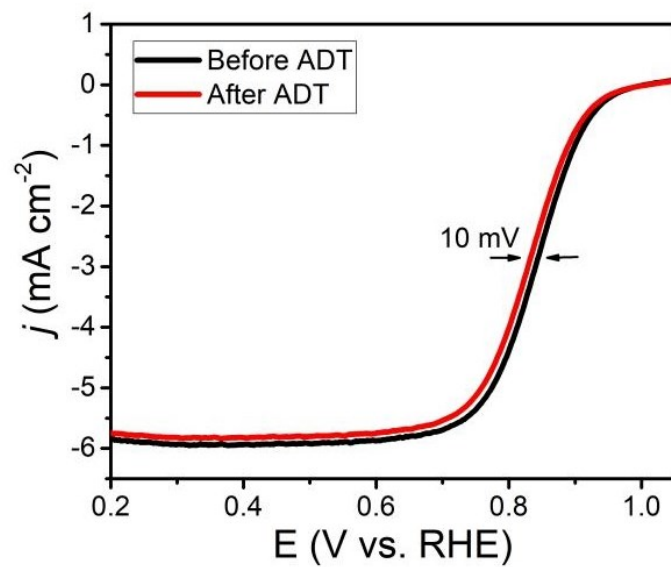

**Fig. S12.** The ORR polarization curves of Pd nanonetwork before and after accelerated durability test.

**Table S1.** Specific ECSAs of the commercial Pd/C and Pd nanonetworks derived from the charges responsible for the CO desorption.

| Catalysts       | ECSA ( $\text{m}^2 \text{g}_{\text{Pd/Pt}}^{-1}$ ) |
|-----------------|----------------------------------------------------|
| Commercial Pd/C | 33.8                                               |
| Pd nanonetworks | 18.6                                               |
| Commercial Pt/C | 61.3                                               |

**Table S2.** ORR performances of the commercial Pd/C catalyst and Pd nanonetworks at 0.85 V and 0.9 V vs reversible hydrogen electrode (RHE). The mass and specific activities of the catalysts given as kinetic current density ( $j_k$ ) were normalized to the Pd mass and ECSA, respectively.

| Catalysts       | $J_{k,mass}$ (A mg <sub>Pd/Pt</sub> <sup>-1</sup> ) | $J_{k,specific}$ (mA cm <sup>-2</sup> ) | E (V vs. RHE) |
|-----------------|-----------------------------------------------------|-----------------------------------------|---------------|
| Commercial Pd/C | 0.038                                               | 0.204                                   | 0.85          |
|                 | 0.007                                               | 0.038                                   | 0.9           |
| Pd nanonetworks | 0.152                                               | 0.449                                   | 0.85          |
|                 | 0.037                                               | 0.109                                   | 0.9           |
| Commercial Pt/C | 0.396                                               | 0.640                                   | 0.85          |
|                 | 0.109                                               | 0.178                                   | 0.9           |
